# Supplementary material for: Disparities between research attention and burden in liver diseases: implications on uneven advances in pharmacological therapies in Europe and the USA
Source: PubMed Central journal article supplement — BMJ Open. 2017 Mar 22;7(3):e013620. doi: 10.1136/bmjopen-2016-013620 (PMC5372160; doi:10.1136/bmjopen-2016-013620), 2017-03-22
Supplement: bmjopen-2016-013620supp_tables.pdf [file bmjopen-2016-013620supp_tables.pdf]

| <b>Supplementary Table 1: Raw Score for Research Attention at the Two Main Liver Meetings</b> |            |            |              |            |
|-----------------------------------------------------------------------------------------------|------------|------------|--------------|------------|
| <b>Conference (year)<br/>(Raw values)</b>                                                     | <b>HCV</b> | <b>HBV</b> | <b>NAFLD</b> | <b>ALD</b> |
| <b>AASLD (2010)</b>                                                                           |            |            |              |            |
| Symposia                                                                                      | 2.5        | 0.5        | 0            | 0          |
| Titles of sessions                                                                            | 11         | 6.5        | 3.5          | 2          |
| Oral - general presentations                                                                  | 8          | 2          | 1            | 0          |
| Oral - parallel presentations                                                                 | 7.5        | 8.5        | 2            | 2          |
| Poster presentations                                                                          | 320.5      | 217.5      | 87           | 17         |
| <b>AASLD (2011)</b>                                                                           |            |            |              |            |
| Symposia                                                                                      | 1          | 0          | 0            | 0          |
| Titles of sessions                                                                            | 15.5       | 8.5        | 7            | 2          |
| Oral - general presentations                                                                  | 1.5        | 0.5        | 1            | 0          |
| Oral - parallel presentations                                                                 | 6.5        | 1.5        | 2            | 2          |
| Poster presentations                                                                          | 222        | 156        | 78.5         | 19         |
| <b>AASLD (2012)</b>                                                                           |            |            |              |            |
| Symposia                                                                                      | 2          | 1          | 0            | 1          |
| Titles of sessions                                                                            | 17.5       | 6.5        | 5            | 2          |
| Oral - general presentations                                                                  | 1.5        | 1.5        | 0            | 1          |
| Oral - parallel presentations                                                                 | 2          | 1          | 2            | 1          |
| Poster presentations                                                                          | 385.5      | 276.5      | 84           | 21         |
| <b>AASD (2013)</b>                                                                            |            |            |              |            |
| Symposia                                                                                      | 2          | 0.5        | 1.5          | 1.5        |
| Titles of sessions                                                                            | 13.5       | 10.5       | 6            | 3          |
| Oral - general presentations                                                                  | 1.5        | 0.5        | 0            | 0          |
| Oral - parallel presentations                                                                 | 10         | 3.5        | 2            | 1          |
| Poster presentations                                                                          | 379.5      | 270        | 98.5         | 33         |
| <b>AASLD (2014)</b>                                                                           |            |            |              |            |
| Symposia                                                                                      | 2          | 0          | 0.5          | 0.5        |
| Titles of sessions                                                                            | 12         | 9          | 6            | 2          |
| Oral - general presentations                                                                  | 2          | 0          | 0            | 0          |
| Oral - parallel presentations                                                                 | 6          | 5          | 4            | 2          |
| Poster presentations                                                                          | 400.5      | 215        | 142.5        | 45         |
| <b>EASL (2010)</b>                                                                            |            |            |              |            |
| Symposia                                                                                      | 13.875     | 4.625      | 1.75         | 1.25       |
| Titles of sessions                                                                            | 9          | 6.25       | 3.125        | 2.625      |
| Oral - general presentations                                                                  | 6.5        | 1.75       | 2.25         | 0.25       |
| Oral - parallel presentations                                                                 | 4.125      | 3.25       | 1.625        | 1.375      |
| Poster presentations                                                                          | 236.375    | 105.875    | 57.75        | 24.625     |
| <b>EASL (2011)</b>                                                                            |            |            |              |            |
| Symposia                                                                                      | 11         | 5          | 0            | 1          |
| Titles of sessions                                                                            | 8          | 5          | 2            | 2          |
| Oral - general presentations                                                                  | 4          | 0          | 1            | 1          |
| Oral - parallel presentations                                                                 | 5          | 2          | 1            | 1          |
| Poster presentations                                                                          | 265.5      | 119.5      | 67.5         | 17.5       |
| <b>EASL (2012)</b>                                                                            |            |            |              |            |

|                                                                                                                                            |          |         |       |         |
|--------------------------------------------------------------------------------------------------------------------------------------------|----------|---------|-------|---------|
| <b>Symposia</b>                                                                                                                            | 9        | 5       | 1     | 1       |
| <b>Titles of sessions</b>                                                                                                                  | 9.5      | 4.5     | 1.5   | 1.5     |
| <b>Oral - general presentations</b>                                                                                                        | 5.5      | 0.5     | 3     | 0       |
| <b>Oral - parallel presentations</b>                                                                                                       | 3        | 4.5     | 1     | 1       |
| <b>Poster presentations</b>                                                                                                                | 213      | 101     | 65    | 27      |
| <b>EASL (2013)</b>                                                                                                                         |          |         |       |         |
| <b>Symposia</b>                                                                                                                            | 11.5     | 2.5     | 2     | 1       |
| <b>Titles of sessions</b>                                                                                                                  | 9.5      | 7.5     | 4     | 3       |
| <b>Oral - general presentations</b>                                                                                                        | 7.5      | 2.5     | 3     | 0       |
| <b>Oral - parallel presentations</b>                                                                                                       | 4.5      | 3.5     | 1.5   | 1.5     |
| <b>Poster presentations</b>                                                                                                                | 312      | 123.5   | 69    | 36.5    |
| <b>EASL (2014)</b>                                                                                                                         |          |         |       |         |
| <b>Symposia</b>                                                                                                                            | 24       | 6       | 4     | 2       |
| <b>Titles of sessions</b>                                                                                                                  | 9        | 8       | 5     | 4       |
| <b>Oral - general presentations</b>                                                                                                        | 9        | 4       | 2     | 0       |
| <b>Oral - parallel presentations</b>                                                                                                       | 4        | 3       | 3     | 2       |
| <b>Poster presentations</b>                                                                                                                | 155      | 79.5    | 29.5  | 17.5    |
| <b>TOTAL</b>                                                                                                                               | 3182.875 | 1810.75 | 866.5 | 308.625 |
| Abbreviations: HCV - Hepatitis C Virus, HBV - Hepatitis B Virus, NAFLD - Non-Alcoholic Fatty Liver Disease, ALD - Alcoholic Liver Disease. |          |         |       |         |

**Supplementary table 2: Drugs in Development Pipelines of 38 Major Pharmaceutical Companies**

| Pharmaceutical Companies                 | HCV | HBV | NAFLD | ALD |
|------------------------------------------|-----|-----|-------|-----|
| Abbott Laboratories                      | 28  | 2   | 0     | 1   |
| Gilead                                   | 8   | 4   | 2     | 0   |
| Johnson & Johnson                        | 4   | 0   | 0     | 0   |
| Merck & Co                               | 5   | 0   | 0     | 0   |
| Roche                                    | 4   | 0   | 0     | 0   |
| Bristol-Myers Squibb                     | 3   | 3   | 0     | 0   |
| GlaxoSmithKline                          | 4   | 0   | 0     | 0   |
| Vertex                                   | 2   | 0   | 0     | 0   |
| Novartis                                 | 1   | 0   | 0     | 0   |
| Astellas Pharma US, Inc                  | 0   | 0   | 0     | 0   |
| Bayer Health Care                        | 0   | 0   | 0     | 0   |
| Boehringer Ingelheim Pharmaceutical, Inc | 0   | 0   | 0     | 0   |
| Eli Lilly                                | 0   | 0   | 0     | 0   |
| Pfizer                                   | 0   | 0   | 0     | 0   |
| Salix                                    | 0   | 0   | 0     | 0   |
| CSL                                      | 0   | 0   | 0     | 0   |
| Chugai Pharmaceutical Co.                | 0   | 0   | 0     | 0   |
| Biogen Idec                              | 0   | 0   | 0     | 0   |
| Otsuka Pharmaceutical                    | 0   | 0   | 0     | 1   |
| Mitsubishi Pharma                        | 2   | 0   | 0     | 0   |
| Dainippon Sumitomo Pharma                | 0   | 0   | 0     | 0   |
| Kyowa Hakko                              | 0   | 0   | 0     | 0   |
| Shionogi                                 | 0   | 0   | 0     | 0   |
| Mylan Laboratories                       | 0   | 0   | 0     | 0   |
| H. Lundbeck                              | 0   | 0   | 0     | 0   |
| Daiichi Sankyo                           | 0   | 0   | 0     | 0   |
| Novo Nordisk                             | 0   | 0   | 0     | 0   |
| Valeant Pharmaceuticals                  | 0   | 0   | 0     | 0   |
| Eisai                                    | 0   | 0   | 0     | 0   |
| Merck KGaA                               | 0   | 0   | 0     | 0   |
| AbbVie                                   | 0   | 0   | 0     | 0   |
| UCB                                      | 0   | 0   | 0     | 0   |
| Genzyme                                  | 0   | 0   | 0     | 0   |
| Baxter International                     | 0   | 0   | 0     | 0   |
| Teva Pharmaceutical Industries           | 0   | 0   | 0     | 0   |
| Amgen                                    | 0   | 0   | 0     | 0   |
| Takeda Pharmaceuticals Co                | 0   | 0   | 0     | 0   |
| Sanofi                                   | 0   | 0   | 0     | 0   |
| Astrazeneca                              | 0   | 0   | 0     | 0   |

\*Drugs not specifically allocated to the liver disease etiologies were not included.

| <b>Supplementary Table 3: Total Number of Research Opportunities in Europe and the U.S.</b> |            |            |              |            |
|---------------------------------------------------------------------------------------------|------------|------------|--------------|------------|
| <b>Raw Values for Research Opportunities in Europe and U.S.</b>                             |            |            |              |            |
|                                                                                             | <b>HCV</b> | <b>HBV</b> | <b>NAFLD</b> | <b>ALD</b> |
| <b>NIH</b>                                                                                  | 738        | 328        | 300          | 47         |
| <b>CORDIS</b>                                                                               | 52.5       | 25.5       | 6            | 0          |
| <b>Registered Clinical Trials</b>                                                           |            |            |              |            |
|                                                                                             | 407        | 461        | 235          | 66         |
| <b>Scientific articles from PubMed</b>                                                      |            |            |              |            |
|                                                                                             | 15438      | 10724      | 5518         | 1728       |

| <b>Supplementary Table 4: Major Liver Disease's Burden</b>                                  |            |            |              |            |
|---------------------------------------------------------------------------------------------|------------|------------|--------------|------------|
| <b>Raw Values for Liver Disease's Burden</b>                                                |            |            |              |            |
|                                                                                             | <b>HCV</b> | <b>HBV</b> | <b>NAFLD</b> | <b>ALD</b> |
| <b>OLT-EU (%)</b>                                                                           | 28         | 10.5       | 10           | 38.5       |
| <b>OLT-US (%)</b>                                                                           | 40.05      | #          | 15.8         | 23.15      |
| <b>*Cause of Cirrhosis (n, %)</b>                                                           | 46, 46.5%  | 3, 3.0%    | 27, 27.3%    | 25, 25.3%  |
| <b>**Cause of fibrosis (n, %)</b>                                                           | 8, 8.99%   | 5, 5.62%   | 37, 41.6%    | 27, 30.3%  |
| <b>Mortality US (%)</b>                                                                     | 22.82      | 0.54       | 2.65         | 49.62      |
| <b>Hospitalization Cost</b>                                                                 | \$167,785  | \$52,062   | \$45,755     | \$848,189  |
| <b>Patient Admissions and Discharges (n)</b>                                                | 14749      | 4568       | 2858         | 64752      |
| *Based on a sample size of 99 subjects                                                      |            |            |              |            |
| ** Based on a sample size of 1358 subjects, 89 subjects had LSM >8kPa                       |            |            |              |            |
| # Due to the significantly decreasing incidence of HBV Wong et al did not include that data |            |            |              |            |

**Supplementary Table 5: Published Clinical Trials from 2010- 2014**

| <b>Published Clinical Trials from 2010- 2014</b> |             |             |             |             |             |              |
|--------------------------------------------------|-------------|-------------|-------------|-------------|-------------|--------------|
| <b>NEJM</b>                                      | <b>2010</b> | <b>2011</b> | <b>2012</b> | <b>2013</b> | <b>2014</b> | <b>Total</b> |
| HCV                                              | 1           | 6           | 1           | 6           | 11          | 25           |
| HBV                                              | 0           | 1           | 0           | 0           | 0           | 1            |
| NAFLD                                            | 0           | 0           | 0           | 0           | 0           | 0            |
| ALD                                              | 0           | 2           | 0           | 0           | 0           | 2            |
| <b>LANCET</b>                                    | <b>2010</b> | <b>2011</b> | <b>2012</b> | <b>2013</b> | <b>2014</b> | <b>Total</b> |
| HCV                                              | 2           | 0           | 1           | 6           | 9           | 18           |
| HBV                                              | 0           | 0           | 2           | 2           | 2           | 6            |
| NAFLD                                            | 1           | 0           | 0           | 0           | 2           | 3            |
| ALD                                              | 0           | 0           | 0           | 0           | 0           | 0            |
| <b>ANNALS</b>                                    | <b>2010</b> | <b>2011</b> | <b>2012</b> | <b>2013</b> | <b>2014</b> | <b>Total</b> |
| HCV                                              | 0           | 0           | 0           | 0           | 0           | 0            |
| HBV                                              | 0           | 0           | 0           | 0           | 0           | 0            |
| NAFLD                                            | 0           | 0           | 0           | 0           | 0           | 0            |
| ALD                                              | 0           | 0           | 0           | 0           | 0           | 0            |
| <b>JAMA</b>                                      | <b>2010</b> | <b>2011</b> | <b>2012</b> | <b>2013</b> | <b>2014</b> | <b>Total</b> |
| HCV                                              | 0           | 0           | 2           | 2           | 2           | 6            |
| HBV                                              | 0           | 1           | 0           | 0           | 1           | 2            |
| NAFLD                                            | 0           | 1           | 0           | 0           | 0           | 1            |
| ALD                                              | 0           | 0           | 0           | 1           | 0           | 1            |
| <b>Gastroenterology</b>                          | <b>2010</b> | <b>2011</b> | <b>2012</b> | <b>2013</b> | <b>2014</b> | <b>Total</b> |
| HCV                                              | 16          | 10          | 6           | 8           | 14          | 54           |
| HBV                                              | 3           | 3           | 5           | 2           | 3           | 16           |
| NAFLD                                            | 1           | 0           | 1           | 2           | 1           | 5            |
| ALD                                              | 0           | 0           | 0           | 0           | 2           | 2            |
| <b>Gut</b>                                       | <b>2010</b> | <b>2011</b> | <b>2012</b> | <b>2013</b> | <b>2014</b> | <b>Total</b> |
| HCV                                              | 4           | 1           | 3           | 3           | 3           | 14           |
| HBV                                              | 3           | 3           | 2           | 2           | 2           | 12           |
| NAFLD                                            | 2           | 1           | 0           | 0           | 0           | 3            |
| ALD                                              | 0           | 0           | 0           | 0           | 0           | 0            |
| <b>J Hepatology</b>                              | <b>2010</b> | <b>2011</b> | <b>2012</b> | <b>2013</b> | <b>2014</b> | <b>Total</b> |
| HCV                                              | 3           | 2           | 4           | 13          | 7           | 29           |
| HBV                                              | 3           | 3           | 1           | 5           | 4           | 16           |
| NAFLD                                            | 0           | 1           | 0           | 1           | 0           | 2            |
| ALD                                              | 0           | 1           | 0           | 0           | 0           | 1            |
| <b>Hepatology</b>                                | <b>2010</b> | <b>2011</b> | <b>2012</b> | <b>2013</b> | <b>2014</b> | <b>Total</b> |
| HCV                                              | 6           | 9           | 7           | 6           | 9           | 37           |
| HBV                                              | 4           | 4           | 1           | 3           | 3           | 15           |
| NAFLD                                            | 0           | 1           | 1           | 0           | 0           | 2            |
| ALD                                              | 0           | 0           | 0           | 0           | 0           | 0            |
